# Supplementary material for: The Atmospheric Oxidizing Capacity in China: Part 2. Sensitivity to emissions of primary pollutants
Source: Copernicus journal article supplement (doi:10.5194/egusphere-2024-693), 2024-03-26
Supplement: Supplementary file [file egusphere-2024-693-AC1-supplement.pdf]

## **Response to Reviewers' Comments**

**Dear Editor and Reviewers,**

Thank you very much for your efforts in handling and evaluating our submission. The review comments are very helpful for improving the original manuscript. We have carefully considered them and tried to address all of these comments in the revised version of the manuscript. Below are the detailed point-by-point responses to the review comments. For clarity, the reviewer's comments are listed below in *black italics*, while our responses and changes in the manuscript are highlighted in **blue** and **red**, respectively.

We look forward to receiving a further evaluation of our work.

Best regards,  
Guy Brasseur and co-authors

## General Comments

*This paper contains very lengthy descriptions of model responses to changes in emissions of NO<sub>x</sub>, VOCs, and both in China. The goal of the paper is to help policymakers mitigate ozone increases in urban areas. However, this message gets lost in the lengthy descriptions throughout the paper. The authors should consider significantly shortening their descriptions with a focus on how their findings can clarify the impact of policy measures that either reduce NO<sub>x</sub>, VOCs, or both. Do we need a description of changes in pRO<sub>x</sub>, pO<sub>x</sub>, OH reactivity, NO<sub>x</sub> reactivity, and AVOC? Could a subset of the plots provided with a focus on high ozone and PM<sub>2.5</sub> areas suffice? What is the message the authors want to give regarding PM<sub>2.5</sub>?*

*The authors should also better explain their finding that the combined reduction of NO<sub>x</sub> and AVOC emissions has a larger effect on both ozone and PM<sub>2.5</sub> than the sum of the reductions of NO<sub>x</sub> and AVOC separately. Currently, it reads for example that the best 'value' to be gained in reducing P(O<sub>x</sub>) in summer is reducing NO<sub>x</sub>. This is also said on line 390. Overall, the authors have too much detail on specific changes in their model, and insufficient description of the broader new understanding gained or policy-insights developed.*

*The authors have a modeling setup that could provide insight into the benefits of different types of emissions reductions and help us gain insight into the impacts of the reductions in aerosol on ozone concentrations. The aerosol impacts on ozone could be the most interesting part of this paper but the manuscript as written is far too lengthy and lacks clear and concise messaging. The authors describe many model metrics (pRO<sub>x</sub>, pO<sub>x</sub>, AVOC) but it is not clear what different insights are gained from each one, or if a singular metric would suffice to describe the relevant model impacts. If the authors are able to revise the paper to increase the value of their scientific analysis and refine their messaging, then it would be appropriate for publication.*

Author's reply: We would like to thank the reviewer for so carefully reading our manuscript and for making all the comments. Based on these comments, we significantly condensed our paper, which was judged to be lengthy. We have condensed the description of our model results and have focused on providing insights about how to mitigate ozone increase in urban China. Regarding the metrics used in this paper to characterize the photochemical environment, we only kept the changes in the Atmospheric Oxidative Capacity (AOC) in the main text and moved a reference to the other metrics to supplement. Regarding PM<sub>2.5</sub>, we largely shortened the description on the changes in PM<sub>2.5</sub> due to emissions reduction and elaborated on how the changes in the aerosol load affect the ozone formation. The structure of the new version of the paper is expressed in the paper as follows (Line 158-166 in Text).

**“This paper is structured as follows. Section 2 introduces the setups of the model system and describes the simulations performed for specified reductions in the emissions of**

primary pollutants. In Section 3, we first analyze the response in the near-surface concentration of ozone precursors and intermediate to primary emission reduction. We also discuss the changes in the ozone formation regime. Further, we derive the associated changes in ozone, and aerosols to emission reductions. Finally, we describe the sensitivity of the atmospheric oxidative capacity (AOC) to the reduction in emissions. A summary and implication for policy making of our study is provided in Sec. 4.”

### Specific Comments

*Intro: I would expect that in VOC-limited areas, decreasing NO<sub>x</sub> would result in higher OH from reduced loss of OH to OH + NO<sub>2</sub> to HNO<sub>3</sub>. Thus, HO<sub>2</sub> would be higher from increased VOC oxidation. Is the aerosol uptake effect on NO<sub>2</sub> from reduced nitrate aerosol really larger?*

Author’s reply: Based on our results and regarding the increased concentration of HO<sub>2</sub>, it is difficult to compare the contribution of the VOC oxidation by enhanced OH with the contribution of a reduced aerosol uptake. To clarify the underlying reasons for the summertime ozone increase, we changed the sentence in the introduction as follows (Line 55-58 in Text).

“This O<sub>3</sub> increase is associated with a reduced NO<sub>x</sub>-titration effect and with higher levels of hydroxyl (OH) and hydroperoxyl (HO<sub>2</sub>) radicals due to a reduced loss by reactions with nitrogen dioxide (NO<sub>2</sub>) and by a decreased aerosol uptake”.

*Line 110 – “nitration” should be “titration”. Also, please clarify the meaning of this statement “and the competition between NO<sub>2</sub> and VOC for OH radicals”.*

Author’s reply: We corrected the mistake and deleted the unclear statement. The sentence is changed to (Line 111-113 in Text):

“In VOC-sensitive regimes, the reduction in the NO<sub>x</sub> abundance tends to enhance the ozone formation due to the weakening of NO titration and the reduced loss of OH radical reacted with NO<sub>2</sub>”.

*Line 214 – “Validated” implies the model was correct in the companion study while there were a variety of model shortcomings described such as overestimated summertime NO<sub>2</sub> and PM<sub>2.5</sub>. It would be better to describe how any model biases impact the conclusions rather than call the model “validated”.*

Author’s reply: We added one sentence in the text, regarding the discussion of the aerosol effect on the ozone formation (Line 504-508 in Text):

“An overestimation in the concentration of NO<sub>2</sub> and PM<sub>2.5</sub> has been simulated for the

baseline conditions, which can possibly lead to a higher reduction in aerosol concentration, especially in the concentration of  $\text{NO}_3^-$ . This overestimation potentially affects the aerosol-related changes in ozone formation.”

*Line 237 – Has anyone done a weekend/weekday analysis of ozone to see whether ozone goes up or down when  $\text{NO}_x$  is reduced on the weekends, assuming that is the case in China? A quick search found studies like this: <https://www.sciencedirect.com/science/article/pii/S1474706518302110>, or <https://www.nature.com/articles/s41598020-64111-3>. If so, please cite those studies here as support for your spatial distribution of regimes.*

Author’s reply: These two references as well as the reference to (Tonnesen and Dennis, 2000) are added to our manuscript to support our description on the ozone sensitivity regimes.

*Line 312 – Can you explain why that is?*

Author’s reply: The higher value of  $P(\text{RO}_x)$  in the TOTAL case (with the emissions reduction in  $\text{NO}_x$ , AVOCs,  $\text{NH}_3$ ,  $\text{SO}_2$ , and CO) relative to the level in the N+A case (with the emission reduction in  $\text{NO}_x$  and AVOCs) is due to the higher concentration of OVOCs (Figure 1a) and of ozone (Figure 1b), whose photolysis produces more photochemical radicals.

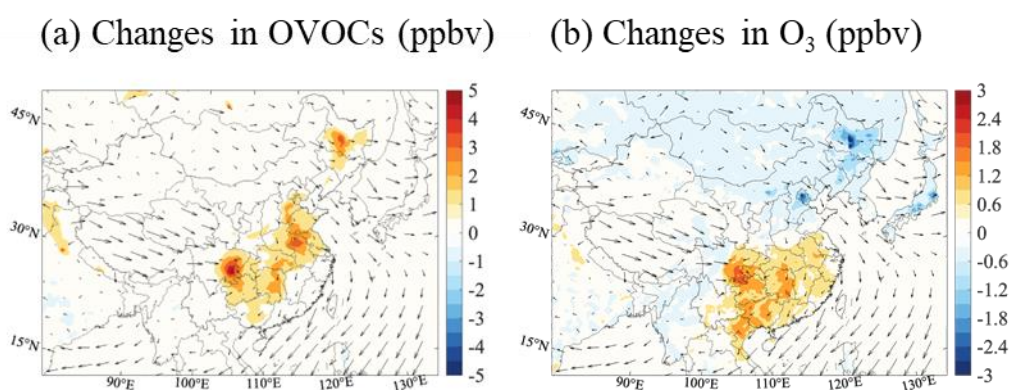

Figure 1. Changes in the concentration of OVOCs and ozone at the surface due to the emissions reduction in TOTAL case relative to N+A cases for January 2018.

*Section 3.2: This goes into great detail on how the budgets of radicals change, and I find it difficult to see what the overall conclusion is that is either policy-relevant or novel. Instead, it just reads like a helpful description of the model behavior which may be useful for other modelers but is not necessary in the main text. In that case, the paper could be shortened by a quick summary of the major effects (less  $\text{NO}_x$  = less loss to  $\text{HNO}_3$ , less VOCs = less  $p\text{RO}_x$  from OVOCs, less CO = more  $p\text{RO}_x$  due to higher OH*

etc) and moving the majority of the discussion to the supplement. If not, the authors need to better state the importance of their description.

Author's reply: Following your suggestions, we deleted the details dealing with the description of the changes in the radical's budget and condensed it with the description of the changes in the surface mixing ratios OH and HO<sub>2</sub> radicals in response to emissions reduction (in Section 3.1.1).

Line 390 – Can the authors be more specific about the meaning of “further enhanced”? Why should policy makers bother if most of the impact is from NO<sub>x</sub>?

Author's reply: Based on our results, the impact of NO<sub>x</sub> emissions reduction on the production of radicals is larger than the impact of AVOCs emissions reduction. The decrease in radical due to reduced NO<sub>x</sub> emissions can be partially counteracted by the reduced AVOCs emissions in the urban areas. As shown in Figure 2a, the reduction in NO<sub>x</sub> leads to a decrease in the OH radical of the non-urban areas (NO<sub>x</sub>-limited) in southern China, while an increase in the OH radical in urban areas (VOC-limited), results from the reduced loss by the reaction with reduced NO<sub>2</sub>. The reduction in AVOCs leads to decreases in the OH radicals mixing ratio (Figure 2b), due to the reduced VOC oxidation. As the reduction in NO<sub>x</sub> emission alone is not sufficient for reducing the concentration of the OH radical in all geographical areas in China, a concomitant reduction in AVOCs emissions is needed. More details can be found in Section 3.1.1 of our paper.

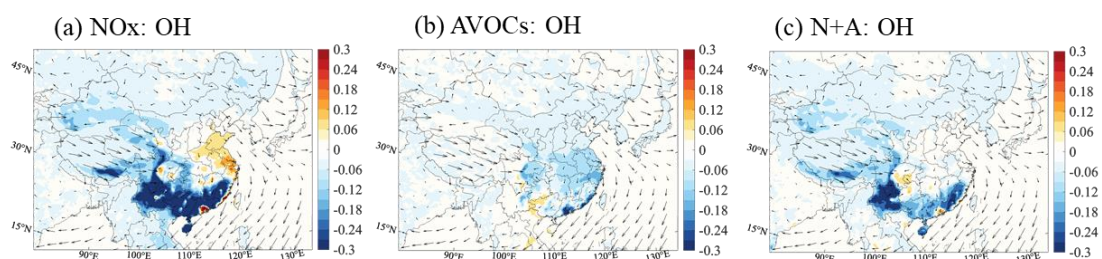

Figure 2. Changes in the averaged daytime surface mixing ratio of the OH radical (a-c, Unit: 0.1 pptv) in response to a 50% reduction in NO<sub>x</sub> emissions (a; NO<sub>x</sub> case), in anthropogenic VOCs (AVOCs) emissions (b; AVOCs case) and in NO<sub>x</sub> and AVOCs emissions (c; N+A case) relative to the BASE case for January of 2018.

Line 392 – The authors state that reductions in ‘specific AVOCs’ are needed but so far they have only discussed AVOCs as a whole.

Author's reply: In our simulations for the present study, we only considered the reduction in AVOCs emissions as a whole without partitioning between species. However, we discussed the impact of AVOCs emissions reduction on specific VOCs (hydrocarbons and OVOCs), listed in Section 3.1.2; and the changes in the contribution

of the reactions of specific VOCs with OH and ozone to the Atmospheric Oxidative Capacity in Section 3.3.

*Line 424 – The increase in OH in Hong Kong appears very strong as well.*

Author's reply: We selected four city sites (Beijing, Shanghai, Guangzhou, Chengdu sites) to discuss the changes in OH radical. As the location of Hong Kong site is close to the Guangzhou site, we deleted the description for the Hong Kong sites in the main text.

*Line 473 – Does the model really have  $\text{NH}_3 + \text{OH}$  as a significant sink of OH? If the authors are referring to its impact on SIA and thus  $\text{HO}_2$  uptake, this is not clear.*

Author's reply: Our model includes the reaction between  $\text{NH}_3$  and OH, but it is not a significant sink of OH. The increase in OH radical represented here is mainly due to the less consumption by reduced CO concentrations. We changed the statement as follows (Line 284-293 in Text):

“When accounting for the additional reduction in other anthropogenic emissions ( $\text{NH}_3$ ,  $\text{SO}_2$ , and CO) (*TOTAL* case), the mixing ratio of the OH radical is positively modified, relative to the results in the combined case (*N+A* case). As shown in Fig. S4a, the mixing ratio of the OH radical is enhanced in the PRD and SCB regions (by up to 22%). This increase is due to the lowered consumption of the OH radical by the reduced concentration of carbon monoxide (CO) (Fig. S5a), due to its reduced emissions (Fig. S1d). For the  $\text{HO}_2$  radicals, the additional reduction in the other emissions also contributes to a larger mixing ratio, with a pronounced increase in southern China (by up to 18%; Fig. S4c). This increase in the  $\text{HO}_2$  radical mixing ratio is due to the increase in the oxidation of the VOCs by the OH radical and the reduced aerosol uptake of  $\text{HO}_2$  associated with the decrease in the aerosol load”.

*Paragraph starting on line 567 – This discussion is again very lengthy. The figure appears to show that the most important message is that  $\text{NO}_x$  reductions in July alone result in ozone decreases in several major cities (Beijing, Shanghai, Hong Kong?) while adding in AVOC reductions causes the cities to also see an ozone decrease.*

Author's reply: To structure our description, we discussed the ozone changes due to emissions reduction in winter and summer conditions separately. We also summarized the specific ozone changes at four urban sites in Table 1 (Table 2 in Text). and the relevant statement of ozone changes is shown below (Section 3.2.2 in Text).

“*Winter conditions.* In January, the 50% reduction in  $\text{NO}_x$  emission enhanced the surface ozone concentrations, with the largest increase derived in the YRD and PRD regions (15-20% (8-10 ppbv); Fig. 6a). During wintertime, a large part of China is under



a VOC-sensitive regime. Therefore, the reduced titration of ozone by reduced NO (Fig. S13a; Fig. S2c) favors an increase in the ozone concentration. If AVOCs emissions are reduced by 50%, the surface ozone is reduced by 4-10% (2.0 to 8.0 ppbv; Fig. 6b) in the southern part of China. This ozone decrease is associated with the reduced concentration of HO<sub>x</sub> radicals and hence a reduction in the ozone production by the HO<sub>2</sub> + NO reaction (Fig. S14a).

In the combined emission reduction case, the ozone response in VOC-limited areas follows the positive changes found in the NO<sub>x</sub>-reduction case, with an ozone increase of 3.0-7.5 ppbv (4-9%) in North China and in some urban regions in South China (Fig. 6c). Simultaneously, a slight ozone decrease is derived over the southern coast of China (2.0-4.5 ppbv; 5-8%). In these areas, the ozone sensitivity is under the control of the NO<sub>x</sub>. The ozone decrease is dominant by the negative ozone response to the AVOCs emissions reduction. With further emission reduction of the other species, an ozone increase (3-5 ppbv (4-6%); Fig. S5g) relative to the combined case is calculated in the southern part of China.

*Summer condition.* In July, under the reduction in the NO<sub>x</sub> emissions, an increase in the surface ozone concentration of up to 10 ppbv (17%) is calculated in the urbanized regions of NCP, YRD, and PRD (Fig. 6d). These areas are typically located in VOC-limited areas (Fig. 5); thus, the ozone increase is explained by the reduced ozone titration (Fig. S13b). At the same time, in NO<sub>x</sub>-limited areas, the calculated surface ozone concentration is reduced by 2 to 8 ppbv (3-10%), as a result of reduced photochemical formation under lower NO<sub>x</sub> concentrations. With the reduction of AVOCs emissions, the surface ozone concentration decreases by up to 8.0-12.0 ppbv (8-20%; Fig. 6e) in whole areas of China. A spatial shift in the ozone decrease, from the southern regions in winter to the northern regions in summer occurs under this condition; this change is consistent with the spatial distribution of the reduction in the mixing ratio of the HO<sub>2</sub> radical, which contributes to the ozone production by its reaction with nitric oxide (Fig. S14b).

When combining the 50% reduction in the NO<sub>x</sub> and AVOCs emissions, the surface ozone concentration decreases by up to 12 ppbv (15%; Fig. 6f) in NO<sub>x</sub>-sensitive areas. In VOC-sensitive areas, the surface ozone concentration also decreases, as the increase of ozone associated with the positive impact of the reduction in NO<sub>x</sub> emissions is smaller than the negative effect resulting from the reduction in the AVOCs emissions. This is explained by the fact that the loss of ozone due to the reduced NO<sub>x</sub> level is rapidly compensated by the photochemically ozone formation processes, since the ozone production rate is accelerated by the high temperature and photolysis rate during summertime (T. Wang et al., 2022). One exception can be found at the Guangzhou site, where ozone slightly increases by 0.5 ppbv (Fig. S15), which can be explained by the increasingly important role of naturally emitted BVOCs species in the oxidation processes when anthropogenic emissions are reduced (see Sec. 3.3). When the emission reduction is applied to all species under consideration, the ozone changes (Fig. S5h) relative to the combined case are smaller than the changes in winter, due to a

consistently smaller reduction in aerosol concentrations (see Sec. 3.2.3).”

Table 1. Ozone changes due to reduction in emissions in urban sites (in percentage)

| Location | Sites<br>name | Ozone changes in winter condition (Mean $\pm$ SD) |                    |                  |                    |
|----------|---------------|---------------------------------------------------|--------------------|------------------|--------------------|
|          |               | NO <sub>x</sub> <sup>a</sup>                      | AVOCs <sup>b</sup> | N+A <sup>c</sup> | TOTAL <sup>d</sup> |
| North    | Beijing       | 25.0 $\pm$ 25.2 <sup>e</sup>                      | -2.5 $\pm$ 1.3     | 22.0 $\pm$ 32.8  | 20.0 $\pm$ 19.5    |
| East     | Shanghai      | 33.2 $\pm$ 35.3                                   | -18.2 $\pm$ 13.5   | 21.8 $\pm$ 20.5  | 22.7 $\pm$ 18.8    |
| South    | Guangzhou     | 21.4 $\pm$ 22.6                                   | -17.1 $\pm$ 11.2   | 7.1 $\pm$ 3.2    | 10.0 $\pm$ 3.5     |
| West     | Chengdu       | 21.3 $\pm$ 23.8                                   | -9.4 $\pm$ 8.5     | 14.1 $\pm$ 8.3   | 20.3 $\pm$ 13.5    |
| Location | Sites<br>name | Ozone changes in summer condition (Mean $\pm$ SD) |                    |                  |                    |
|          |               | NO <sub>x</sub>                                   | AVOCs              | N+A              | TOTAL              |
| North    | Beijing       | 6.4 $\pm$ 3.8                                     | -21.8 $\pm$ 19.2   | -5.5 $\pm$ 4.2   | -7.3 $\pm$ 5.0     |
| East     | Shanghai      | 17.1 $\pm$ 12.8                                   | -22.9 $\pm$ 20.8   | -2.9 $\pm$ 2.1   | -2.6 $\pm$ 1.5     |
| South    | Guangzhou     | 15.0 $\pm$ 13.1                                   | -14.5 $\pm$ 13.5   | 1.3 $\pm$ 1.0    | 1.3 $\pm$ 0.9      |
| West     | Chengdu       | 5.5 $\pm$ 4.5                                     | -14.5 $\pm$ 10.2   | -5.5 $\pm$ 2.0   | -4.5 $\pm$ 1.9     |

a-d. Sensitivity cases with a 50% reduction in NO<sub>x</sub> emissions (NO<sub>x</sub>), AVOCs emissions (AVOCs), NO<sub>x</sub> and AVOCs (N+A), and other species (NO<sub>x</sub>, AVOCs, CO, NH<sub>3</sub>, SO<sub>2</sub>) under consideration (TOTAL).

e. Values are displayed in the average ozone changes during daytime (06:00-19:00) in percentage with the standard deviation as the error bar. (ozone changes = (case value -base-line case) \*100).

*Line 599 – How do reduced AVOCs impact nitrate, sulfate, and ammonium? It is not clear from this sentence.*

Author’s reply: The aerosol decrease due to the reduction in AVOCs emissions is attributed to the decrease in SOA, with minor impact on SIA. We changed the statement as follows (Line 502-505 in Text):

“With a 50% reduction of AVOCs emissions, the changes in the aerosol concentration are smaller than with the 50% reduction in NO<sub>x</sub> emissions, with a decrease of less than 4% (5  $\mu\text{g m}^{-3}$ ; Fig. 7b), which predominantly results from the reduction in SOA (Fig. S18a).



*Line 628 – How much does photolysis increase in your model with reduced aerosol?*

Author's reply: The photolysis increases by about 5-20% in winter and 3-10% in summer, as shown in Figure 3 (Fig. S20 in Text). We added some description of aerosol-related increase in photolysis and its potential impact ozone formation in the text shown below (Line 534-541 in Text).

“This decrease in the aerosol burden weakens the aerosol extinction effect and therefore enhances the photochemical formation rate of radicals and ozone. As shown in Fig. S20 a-d, the photolysis rate increases (by 5-20%) in southern and central China during winter due to the aerosol decrease induced by the emission reductions. The highest increase in photolysis rates results from the joint emission reduction in NO<sub>x</sub> and AVOCs (Fig. S20c). The increase of the photolysis rates in summer is not as distinct as the increase during wintertime due to the more limited reduction of the aerosol burden during summer (Fig. S20e-h).”

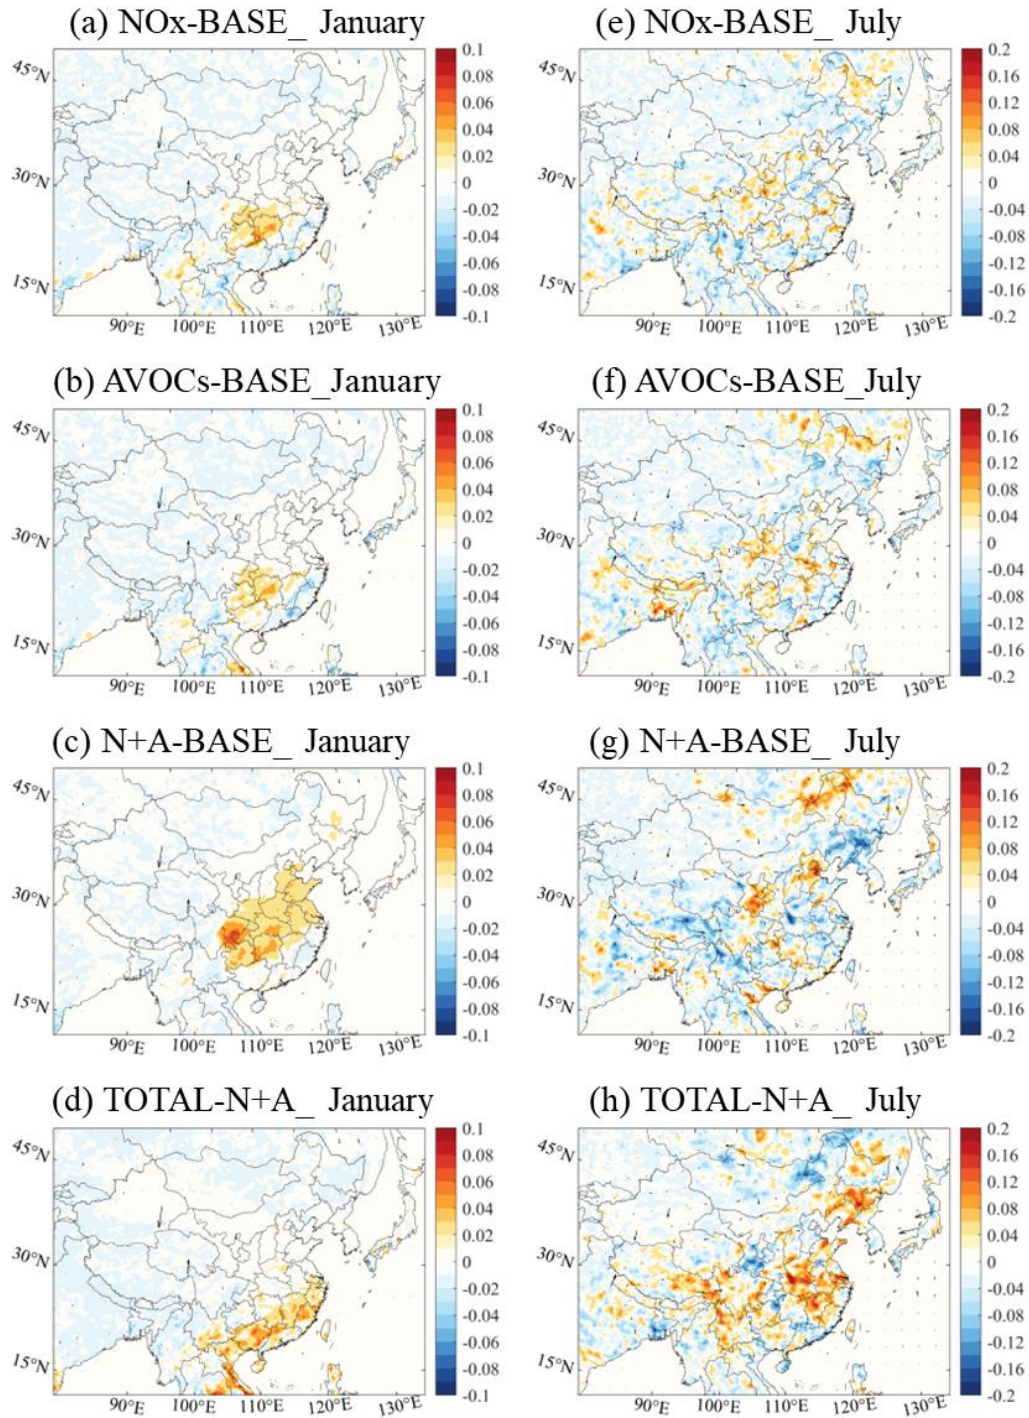

**Figure 3.** Changes in the total photolysis rate (a-d) [Unit:  $s^{-1}$ ] due to the emission reduction in NO<sub>x</sub> (a,e), AVOCs (b,f), NO<sub>x</sub> and AVOCs (N+A)(c, g) relative to the BASE case and TOTAL case relative to N+A cases (d, h) in January (a-d) and July (e-h) of 2018.

*Figure 13 – What is in ‘Other’ that is impacted in your ‘TOTAL’ case? This category is a surprisingly large fraction of model PM<sub>2.5</sub> and thus deserves more discussion. Overall, Fig. 13 contains a lot of information but is barely discussed.*

Author’s reply: The large decrease in the aerosol load for the “TOTAL” case is due to the reduction in the sulfate and ammoniate particulates, as the emissions of SO<sub>2</sub> and NH<sub>3</sub> are reduced in this case. The relevant description is shown below (Line 510-514 in Text):

“With a further reduction in other emissions, the decrease in the concentration of aerosol is deeply enhanced; this is the case for the concentration of NH<sub>4</sub><sup>+</sup> (919a), SO<sub>4</sub><sup>2-</sup> (Fig. S19b), and NO<sub>3</sub><sup>-</sup> particles (Fig. S19c). The concentration of the gas-phase precursors, NH<sub>3</sub> and SO<sub>2</sub>, is considerably reduced, which affects the process of acid replacement (Meng et al., 2022) and hence the level of NO<sub>3</sub><sup>-</sup>.”

Line 645 – Why have a schematic for reduction in NO<sub>x</sub> emissions, but not AVOC emissions, and the combination of the two?

Author’s reply: We changed the schematic and show it below.

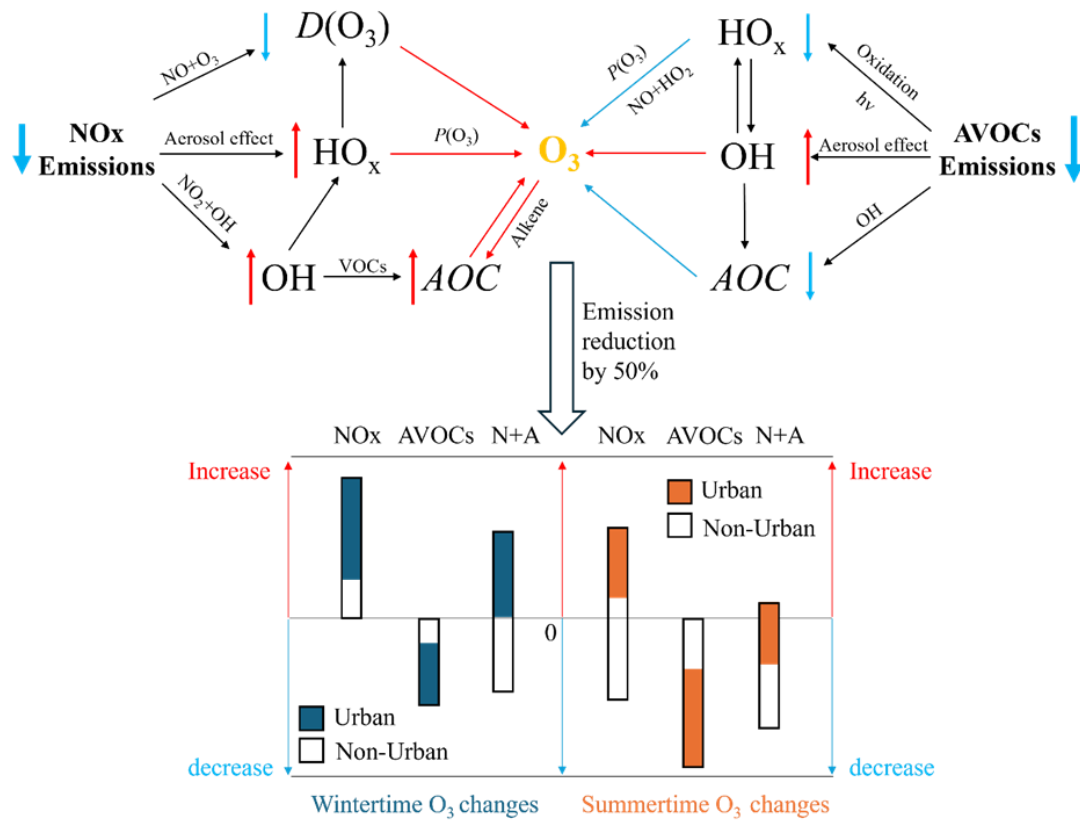

Figure 4. Schematics show the responses of oxidative processes, associated with ozone formation, to the reduction in primary emissions of NO<sub>x</sub> and AVOCs in urban areas (VOC-limited) in winter and summer. Arrows besides the chemicals represent the changes associated with the reduction in emission. (decrease trend shown in blue; increase trend shown in red) Blue and red arrows closing to O<sub>3</sub> represent the positive and negative contributions to the ozone formations. AOC, P(O<sub>3</sub>), and D(O<sub>3</sub>) are the abbreviations of the Atmospheric Oxidative Capacity, production of ozone, and

destruction of ozone. Bar figure shows the ranges of ozone changes in whole of China (black bar), in non-urban areas (white part in the bar), and in urban areas (colored part in the bar) in three emissions cases (NO<sub>x</sub>, AVOCs, and N+A represent the case with emissions reduction in NO<sub>x</sub>, Anthropogenic VOCs (AVOCs), and the combined NO<sub>x</sub> and AVOCs emissions, respectively) relative to BASE cases in winter and summer.

Section 3.4.1 – Again, I am not sure what the main message is from this lengthy section.

Author’s reply: We largely condensed the paragraph and kept the discussion about the changes in daytime AOC in response to emission reduction, as it gives us insights on the contributions from the reaction between specific VOCs with OH and O<sub>3</sub>.

Line 755 – What is the result of the increased ozonolysis? Do we get more OVOCs that impact daytime air quality? This is said later but is not clear here.

Author’s reply: The changes in atmospheric oxidative capacity due to the increased ozonolysis are shown in Figure 5a-b. The concentration of OVOCs increases when NO<sub>x</sub> emissions are reduced as shown in Figure 5c-d. The relevant statement in the main text is also shown below (Line 571-573 in Text).

“During nighttime (20:00 to 05:00 LST), the reduction in NO<sub>x</sub> emissions is responsible for an increase in AOC by up to 50% (Fig. S21a). A contribution to this increase is provided by the alkene’s ozonolysis, since the concentration of ozone (Fig. 6 a) and of alkenes is enhanced (Fig. S8c).”

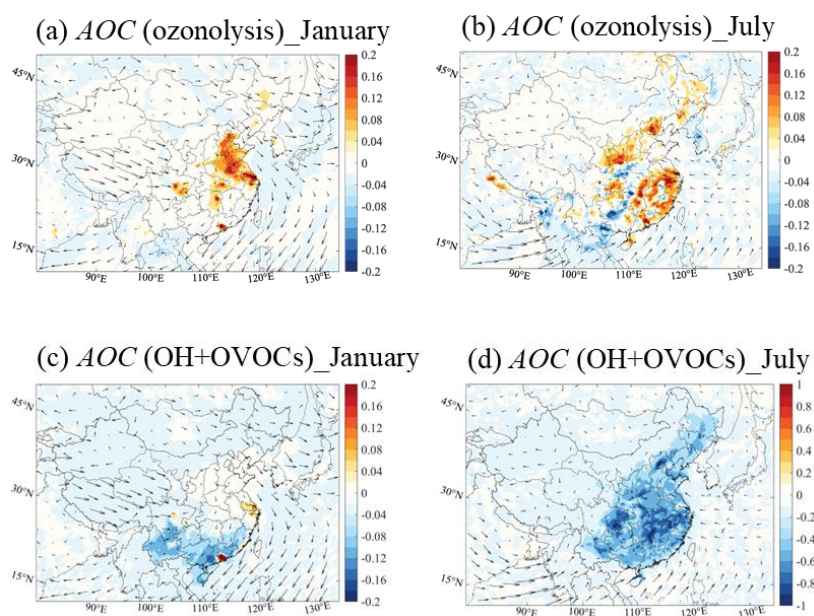

**Figure 5.** Changes in atmospheric oxidizing capacity (AOC, Unit: 10<sup>6</sup> molec. cm<sup>-3</sup> s<sup>-1</sup>) due to the reaction between alkenes and ozone (ozonolysis) (a, b) and the reaction between OH and OVOCs (c, d) in response to the NO<sub>x</sub> emissions case relative to the

BASE case in January (a, c) and July (b, d) of 2018.

*Line 771 – Are these primary OVOCs like methanol or ethanol? Or secondary species like HCHO and acetaldehyde? If secondary, then what are their main precursors? Which ‘unsaturated OVOCs’ should be targeted?*

Author’s reply: In the calculation of atmospheric oxidative capacity (AOC), the reaction related OVOCs includes all OVOCs species (primary and secondary). Considering the contributions of VOCs-related reactions to AOC increase and the increases in OVOCs species associated with NO<sub>x</sub> emissions reduction, we suggest the reduction in the emissions of alkenes, aromatics, and unsaturated OVOCs, especially methanol and ethanol. The relevant statement is shown below (Line 687-689 in Text).

“With the known contribution of the VOCs-related reactions to the AOC, the reduction in the emissions of alkenes, aromatics, and unsaturated OVOCs, especially the methanol and ethanol, should be a priority.”

*Summary – Again, a greater focus on policy-relevant insights would be helpful as there are opposite effects on average compared to in the major cities.*

Author’s reply: we added some policy implications for the ozone mitigation in summary as shown it below.

*“Paths to mitigation. We conclude this paper by highlighting a few chemical paths that should be considered when designing a mitigation policy for a reduction of ozone in the urban areas of China. Figure 10 presents a schematic description of the chemical mechanisms involved in the chemical production of atmospheric ozone and highlights how different reaction paths tend to change the ozone abundance in response to a reduction in NO<sub>x</sub> and anthropogenic VOC (AVOCs) emissions. This graph shows that a reduction in NO<sub>x</sub> emissions tends to increase the ozone concentration by (1) reducing the rate of the NO + O<sub>3</sub> reaction (ozone titration); (2) by increasing the rate of the HO<sub>2</sub> + NO reaction due to an increase in the HO<sub>2</sub> level associated with the reduced uptake of this radical by a lowered aerosol load; (3) by an increase in the atmospheric oxidizing capacity (AOC) through OH- and ozone-related reactions. The graph also shows that a decrease in AVOCs emissions tends (1) to reduce the level of the HO<sub>x</sub> radical and hence the ozone production by the HO<sub>2</sub> + NO reaction; (2) to enhance the level of HO<sub>x</sub> due to the reduced aerosol uptake and (3) to reduce the AOC with a negative effect on the ozone concentration. The relative importance of these different chemical mechanisms varies with location and environmental conditions.*

We conclude that, in winter when the background ozone concentration is low, the reduction of NO<sub>x</sub> emissions tends to increase the level of near-surface ozone, while the reduction in AVOC emissions has the opposite effect. This conclusion applies both in rural and in urban areas. A combined reduction in the emissions of these two primary



pollutants tends to decrease the level of ozone in rural areas, but to increase ozone in urban areas. Thus, in urban areas during winter, an effective approach to reduce the surface ozone concentration is through a strong limitation in the emissions of volatile organic compounds.

In summer when the ozone level is generally high, the reduction of NO<sub>x</sub> emissions is an effective action to reduce the ozone concentration in rural areas, but this measure is counterproductive in the NO<sub>x</sub>-saturated urban areas where ozone is controlled by VOCs. In fact, in urban areas during this season, the mechanisms involved in ozone mitigation are complex. For example, when NO<sub>x</sub> emissions are reduced, the atmospheric OH concentration is enhanced because of its reduced destruction by NO<sub>2</sub>. Following this increase in the OH concentration, an increase in the level of OVOCs, whose photolysis is an important source of HO<sub>x</sub> radicals, also leads to accelerated ozone production and further amplifies the oxidation of VOCs. In addition, the increase in AOC, linked to the reaction of OH and ozone with alkenes and the reactions of OH with OVOCs also contribute to an increase in the ozone production. Further, the reduction in the aerosol load resulting from a reduction in the emissions of aerosol precursors promotes the ozone formation by decreasing the aerosol extinction and by reducing the uptake of HO<sub>2</sub>. If combined with a 50% reduction in AVOCs, the increase in OVOCs and AOC, due to reduced NO<sub>x</sub> emissions, can be offset. However, the aerosol-related promotion of the level of OH and HO<sub>2</sub> radicals can be enhanced, highlighting the complexity of summertime ozone mitigation in urban areas.

Table 2 provides quantitative information on the response of ozone at different urban locations for January and July. In urban areas, the reduction in the level of surface ozone requires a reduction in the emissions of anthropogenic VOCs. However, for practical reasons, a 50% reduction in AVOCs emissions, as assumed in our study, is difficult to implement over a short period of time. With the known contribution of the VOCs-related reactions to the AOC, the reduction in the emissions of alkenes, aromatics, and unsaturated OVOCs, especially the aldehydes and alcohols, should be a priority. The development of efficient mitigation strategies based on the reduction of AVOCs emissions requires, however, more detailed investigations on the reactivity of individual VOCs and on their potential impact on the ozone formation.”

*Line 795 – What about reduced loss of OH to OH + NO<sub>2</sub> which increases the ability to oxidize VOCs?*

*Author’s reply:* We believe the increase of OH due to the reduced loss of OH reacted with NO<sub>2</sub> is an important pathway to the increased ozone formation. We provide a comprehensive statement about how ozone increases in VOCs-limited areas (Figure 4) and show it below (Line 644-651 in Text).

“Figure 10 presents a schematic description of the chemical mechanisms involved in the chemical production of atmospheric ozone and highlights how different reaction



paths tend to change the ozone abundance in response to a reduction in NO<sub>x</sub> and anthropogenic VOC (AVOCs) emissions. This graph shows that a reduction in NO<sub>x</sub> emissions tends to increase the ozone concentration by (1) reducing the rate of the NO + O<sub>3</sub> reaction (ozone titration); (2) by increasing the rate of the HO<sub>2</sub> + NO reaction due to an increase in the HO<sub>2</sub> level associated with the reduced uptake of this radical by a lowered aerosol load; (3) by an increase in the atmospheric oxidizing capacity (AOC) through OH- and ozone-related reactions.”

*Line 830 – The reason for the greater joint impact needs to be explained.*

Author’s reply: we added some explanations for the larger decrease in aerosol in the joint case with the sentence shown below (Line 505-508):

“With a joint reduction in NO<sub>x</sub> and AVOCs (Fig. 7c), the aerosol decrease is larger than the separated effect of the individual emissions decrease, as the increase in the concentration of SOA resulting from the reduced NO<sub>x</sub> emissions is compensated by the reduced AVOCs emissions.”

*Line 853 – Refrain from discussing ‘slight’ changes to focus on the major findings.*

Author’s reply: We deleted the discussion regarding slight changes.

*Line 869 – Here the authors state that their goal is to help develop a strategy for metropolitan areas. If this is the goal of the paper, the authors should consider a greater focus on the impacts on cities (bar chart figures such as Fig. 4).*

Author’s reply: We agree with this statement. We focused our discussion of ozone changes and relevant policy implication at four city sites, as shown in the schematics (Figure 4) of our study.

*Line 869 – The authors already specifically call out categories of VOCs (alkenes, aromatics etc). Could the authors better describe what they mean by ‘more detailed investigations’ here?*

Author’s reply: We elaborated more on the detailed investigation as (Line 683-685 in Text)

“The development of efficient mitigation strategies based on the reduction of AVOCs emissions requires, however, more detailed investigations on the reactivity of individual VOCs and on their potential impact on the ozone formation”

*Code and data availability: This does not include the modifications made to WRF-Chem described in Dai et al., 2023 and used here.*

Author's reply: We are willing to share our code upon asking, and we emphasize this in the code availability part.
